# Supplementary material for: Microfluidic chip grafted with integrin tension sensors for evaluating the effects of flowing shear stress and ROCK inhibitor on platelets
Source: PubMed Central journal article supplement — Lab Chip. 2021 Jun 21;21(16):3128–36. doi: 10.1039/d1lc00259g (PMC8353964; doi:10.1039/d1lc00259g), 2021-06-21

# Microfluidic chip grafted with integrin tension sensors for evaluating the effects of flowing shear force and ROCK inhibitor on platelets

Subin Mao<sup>a,\*</sup>, Anwasha Sarkar<sup>a, b,\*</sup>, Yongliang Wang<sup>b</sup>, Chao Song<sup>a</sup>, Dana LeVine<sup>c</sup>, Xuefeng Wang<sup>b,\*\*</sup>, and Long Que<sup>a,\*\*</sup>

<sup>A</sup> *Electrical and Computer Engineering Department, Iowa State University, Ames, USA, 50011*

<sup>B</sup> *Department of Physics and Astronomy, Iowa State University, Ames, USA, 50011*

<sup>C</sup> *Veterinary Clinical Sciences, Iowa State University, Ames, USA, 50011*

*\*Equal contribution*

*\*\*Correspondence: [lque@iastate.edu](mailto:lque@iastate.edu), [xuefeng@iastate.edu](mailto:xuefeng@iastate.edu)*

## Supplementary Figures

# Figure S1

**a**

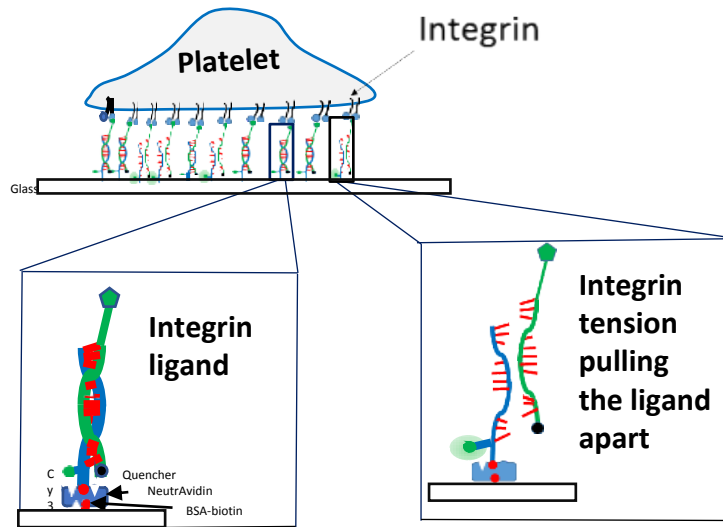

**b**

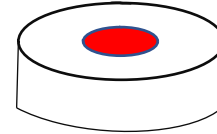

100  $\mu$ l whole blood+ ACD+ ADP for activation on ITS coated substrate ( $T_{tol}$  =12pN)

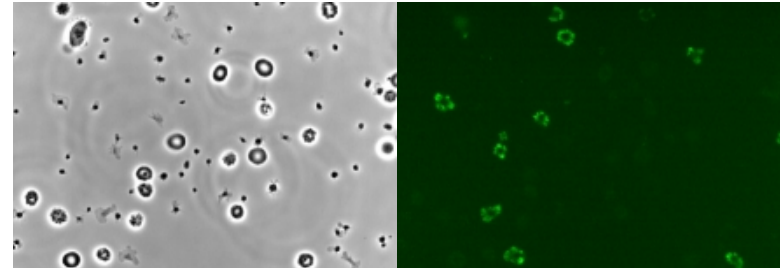

**c**

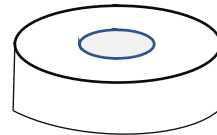

100  $\mu$ l platelet solution in F-12+ADP for activation on ITS coated substrate ( $T_{tol}$  =12pN)

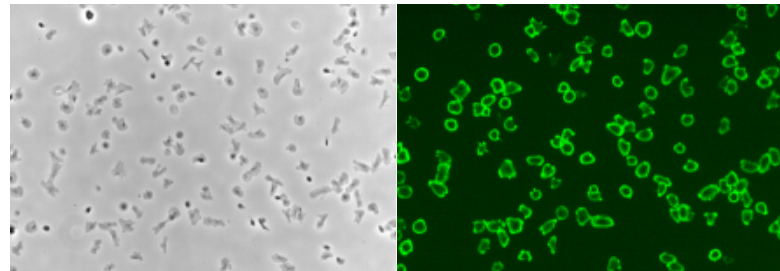

## Figure S2

0.1  $\mu\text{M}$  Biotin-ssDNA-Cy3 coated on microfluidic device

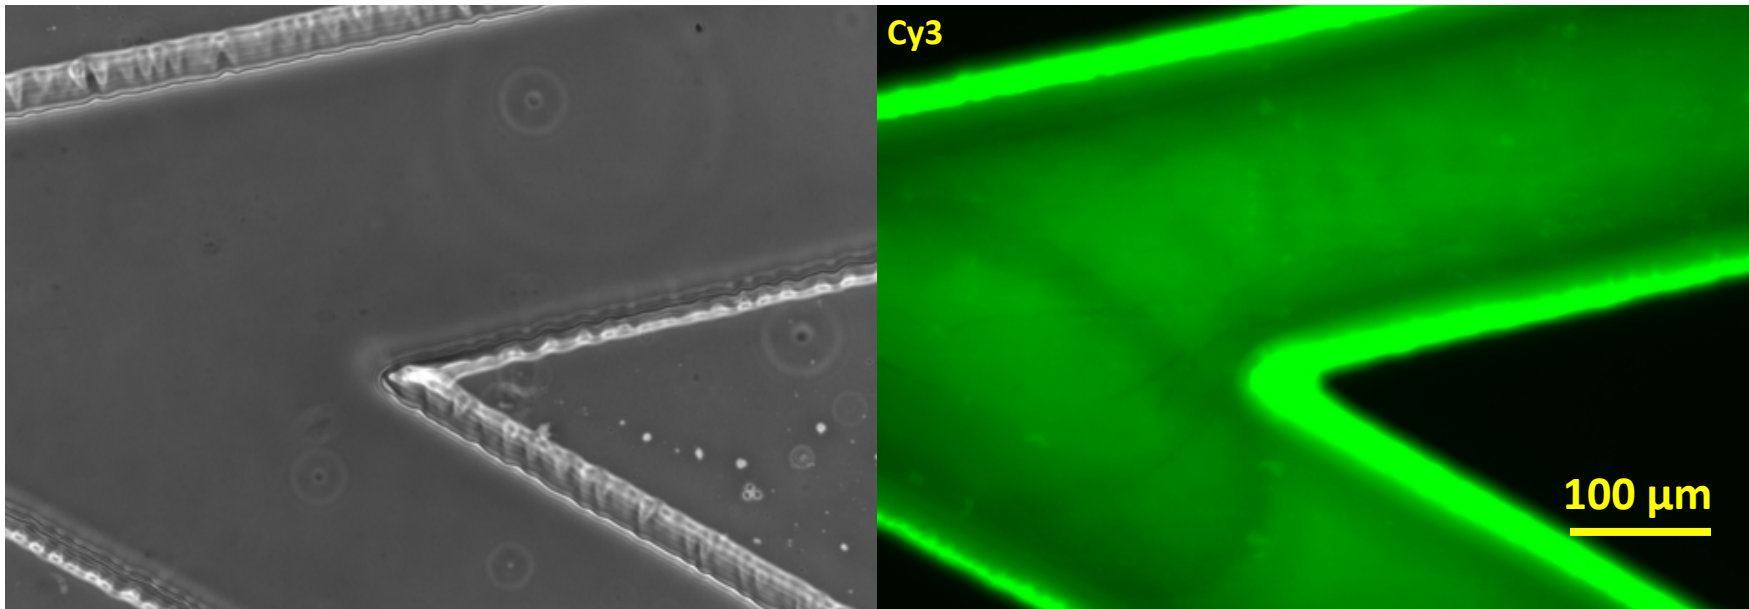

Supplement: LC-021-D1LC00259G-s001.pdf [file LC-021-D1LC00259G-s001.pdf]
